# Supplementary material for: The Impact of Treosulfan -based Conditioning for Inborn Errors of Immunity: Is Dose Monitoring Crucial?
Source: Research Square preprint supplement (doi:10.21203/rs.3.rs-2849238/v1), 2023-05-03
Supplement: Supplementary file 1 [file 168256568b5824046a4f6ee4.xlsx]

## Sheet: Sayfa1
Table. 2 Classification of inborn errors of immunity (IEI)
	Diagnosis	n (%)
Immunodeficiencies affecting cellular and humoral immunity		34 (46.5%)
	T-B+ severe combined immune deficiency (SCID)	5
	T-B- severe combined immune deficiency (SCID)	14
	Combined immunodeficiencies generally less profound than severe combined immunodeficiency	15
Combined immunodeficiencies with associated or syndromic features		6 (8.3%)
	Wiskott-Aldrich Syndrome (WAS)	4
	Chediak-Higashi syndrome	1
	PNP deficiency	1
Immunodysregulation syndromes		21 (28.4%)
	Primary HLH	10
	Gricelli Syndrome	1
	Autoimmune Lymphoproliferative Syndrome	3
	LRBA/CTLA deficiency	1
	EBV-related Lymphoproliferative Syndrome	2
	CD25 deficiency	1
	CD70 mutation	3
Congenital defects of phagocyte number or function		10 (13.8%)
	Leukocyte Adhesion Deficiency	6
	Severe Congenital Neutropenia	2
	Chronic Granulomatous Disease	1
	GATA 2 deficiency	1
Defects in intrinsic and innate immunity		2 (2.9%)
	IFN Receptor deficiency	1
	Osteopetrosis	1
