# Supplementary material for: The Impact of Treosulfan -based Conditioning for Inborn Errors of Immunity: Is Dose Monitoring Crucial?
Source: Research Square preprint supplement (doi:10.21203/rs.3.rs-2849238/v1), 2023-05-03
Supplement: Supplementary file 2 [file 83b1bd098486fe0a20c904ca.xlsx]

## Sheet: Sayfa1
Table 3: Risk Factors that effect mixed chimerism
	Mixed Chimerism (<90%)
	OR (95% CI)	p
Disease Groups (SCID)
HLH	2.389 (0.378 - 15.089)	0.354
WAS	3.583 (0.299 - 42.973)	0.314
LAD	10.75 (1.608 - 71.886)	0.014
ALPS	21.5 (1.581 - 292.368)	0.021
CMV (no)	1.615 (0.394 - 6.618)	0.505
BK virus (no)	0.515 (0.059 - 4.495)	0.548
Pre-transplant infections (no)	0.625 (0.178 - 2.192)	0.463
Pre-transplant CMV (negative)	0.591 (0.067 - 5.218)	0.636
Donor type (MRD)
MUD	0.673 (0.18 - 2.517)	0.556
Haploidentical	0.269 (0.029 - 2.497)	0.248
Stem Cell (BM)
PBSC	0.204 (0.052 - 0.792)	0.022
BM+PBSC	0.611 (0.052 - 7.24)	0.696
Immune Supressive Treatment (1 agent)
2 agents	0.417 (0.094 - 1.849)	0.25
3 agents	0.288 (0.059 - 1.41)	0.125
ATG dose (no)
< 30 mg/kg and below	0.192 (0.034 - 1.076)	0.061
> 30 mg/kg	0.526 (0.125 - 2.21)	0.381
Post Cy (no)	0.468 (0.127 - 1.721)	0.253
Treosulfan Auc (Mg*H/L)	0.999 (0.997 - 1.002)	0.592
*Multivariate model cannot be created statistically.
