# Supplementary material for: The Impact of Treosulfan -based Conditioning for Inborn Errors of Immunity: Is Dose Monitoring Crucial?
Source: Research Square preprint supplement (doi:10.21203/rs.3.rs-2849238/v1), 2023-05-03
Supplement: Supplementary file 3 [file c51139944685d1f24817770e.xlsx]

## Sheet: Sayfa1
Table 1. Descriptive Statistics of Variables
	Mean±Std.Deviation or frequency (%)	Median (Q1 - Q3)
Age	7.1±5.1	5.0 (4.0 – 10.0)
Infection during pre-HSCT period
No	35 (47.9)
Yes	38 (52.1)
CMV status at pre-HSCT period
Negative	64 (87.7)
Positive	9 (12.3)
Age at HSCT	4.2±4.7	3.0 (0.2 - 7.0)
Age groups at HSCT
<2	31 (42.5)
>2	42 (57.5)
Sex
Girls	28 (38.4)
Boys	45 61.6)
Donor type
MRD	27 (37.0)
MUD	31 (42.5)
Haploidentical	15 (20.5)
Hospitalization during HSCT	36.9±11.8	35.0 (30.0 - 41.0)
Post Cy exposure
No	37 (50.7)
Yes	36 (49.3)
Treosulfan dose group
12 gr/m2	30 (41.1)
14 gr/m2	43 (58.9)
ATG dose group
No	21 (28.8)
<30 mg/kg and less	29 (39.7)
>30 mg/kg	23 (31.5)
Conditioning
Treosulfan Fludara	68 (93.2)
Treosulfan Fludarabin Tiotepa	5 (6.8)
Treosulfan Auc (Mg*H/L)	962.5±311.0	916.6 (727.3 - 1159.9)
Early Toxicity*
No	43 (58.9)
Hepatic Toxicity	7 (9.6)
Neurologic Toxicity	4 (5.5)
Skin Toxicity	27 (37.0)
Immune Supressive Treatment
CSA	17 (23.3)
CSA+MTX	4 (5.5)
CSA+MMF	15 (20.5)
CSA+Post Cy	8 (11.0)
CSA+Post Cy+MTX	4 (5.5)
CSA+Post Cy+MMF	25 (34.2)
Number of immune suppresive agents
Only CSA	17 (23.3)
CSA+one agent	27 (37.0)
CSA+two agents	29 (39.7)
Stem Cell Source
BM	17 (23.6)
PBSC	51 (70.8)
BM+PBSC	4 (5.6)
Cd34/ Kg (X106)	6.9±2.9	5.8 (5.3 - 7.0)
Lymphocyte engraftment (days)	22.4±13.1	17.0 (14.0 - 27.0)
Neutrophil engraftment (days)	12.8±2.0	13.0 (11.0 - 14.0)
Trombocyte engrafmant (days)	16.6±7.3	14.0 (12.0 - 19.0)
Mucositis Group
No	19 (26)
Grade 1-2	38 (52)
Grade 3-4	13 (12)
Presence of aGVHD	35 (47.9)
Site of aGVHD *
Skin	25	67.6 (%in aGVHD)
GIS	26	70.3 (%in aGVHD)
Liver	5	13.5 (%in aGVHD)
Grade of aGVHD
Grade 1-2	16	2023-09-21
Grade 3-4	19	26
Presence of cGVHD	6 (8.2)
CMV reactivation	49 (67.1)
BKV reactivation	10 (13.7)
First T-cell chimerism
>90%	63 (87.5)
50-90%	8 (11.1)
non-chimerism	1 (1.4)
Last T-cell chimerism
>90%	60 (83.3)
50-90%	6 (8.3)
<50%	4 (5.6)
non-chimerism	2 (2.8)
Not checked (ex)	1 (1.4)
Graft Loss	4 (5.4)
Survival first 100 days	67 (91.8)
Overall Survival	59 (80.9)
Event Free Survival	49 (67.1)
Second HSCT	5 (6.8)
*may be present in more than one organ system
