# Supplementary material for: The Impact of Treosulfan -based Conditioning for Inborn Errors of Immunity: Is Dose Monitoring Crucial?
Source: Research Square preprint supplement (doi:10.21203/rs.3.rs-2849238/v1), 2023-05-03
Supplement: Supplementary file 4 [file cdacf38c67885d7d8be41ee3.xlsx]

## Sheet: Sayfa1
Table 4: The association of treosulfan AUC with late outcomes
		Mean±Std. Deviation	Median (Q1 - Q3)	Test ist.	p
Acute GVHD	absent	985.02±263.05	970.1 (771.6 - 1149)	0.532	0.596**
	present	942.63±350.58	873 (669.8 - 1159.9)
Mixed chimerism (<%90)	absent	964.01±327.07	911.2 (692.2 - 1210.9)	0.927	0.364**
	present	901.51±142.08	899.5 (796.3 - 981.35)
Graft loss	absent	957.44±313.81	911.2 (708.8 - 1159.9)	58	0.984*
	present	907.65±120.14	907.65 (822.7 - 992.6)
Death in 100 days	alive	953.92±295.28	909.15 (741.6 - 1143.85)	131	0.394*
	exitus	1042.15±460.51	1285.05 (647.8 - 1368)
Last status	alive	951.13±299.73	909.15 (732.35 -1133.2)	289.5	0.434*
	exitus	1001.3±356.11	1136.6 (727.3 - 1335)
*Mann-Whitney U test.	** Independent two-sample t-test
